# Supplementary material
Source: publisher figshare collection journal article supplement (https://gsajournals.figshare.com/ndownloader/files/18679130)
Supplement: Supplementary file 1 [file 18679130]

**Supporting information:**

Title: Genetic control and geo-climate adaption of pod dehiscence provide novel insights into soybean domestication

**Authors**: Jiaoping Zhang1 and Asheesh K. Singh2

**Affiliation**: Department of Agronomy, Iowa State University, Ames, IA 50011, USA

1,2 **Correspondence**: [singhak@iastate.edu](mailto:singhak@iastate.edu), [jiaoping@iastate.edu](mailto:jiaoping@iastate.edu)

**Running title:** Soybean shattering genetics and adaption

Table S1 Bayesian information criterion test of the model fitness.

| Number of PCs/Covariates | BIC (larger is better) - Schwarz 1978 | log Likelihood Function Value |
| --- | --- | --- |
| 0 | -1099.5 | -1089.5 |
| 1 | -1101.6 | -1088.3 |
| 2 | -1103.6 | -1086.9 |
| 3 | -1106.4 | -1086.4 |
| 4 | -1109.3 | -1085.9 |
| 5 | -1112.6 | -1085.9 |
| 6 | -1115.2 | -1085.1 |
| 7 | -1118.5 | -1085.1 |
| 8 | -1121.9 | -1085.1 |
| 9 | -1123.7 | -1083.7 |
| 10 | -1127.1 | -1083.7 |

Table S2 Forty eight SNPs covering the regions of candidate genes obtained from Phytozome (<https://phytozome.jgi.doe.gov>) were used for candidate gene association analysis.

|  | SNP | Chr | Position | Alleles |
| --- | --- | --- | --- | --- |
| 1 | ss.98955913 | 7 | 4325588 | TAC / T |
| 2 | ss.98955917 | 7 | 4325673 | A / ATGAC |
| 3 | ss.98955918 | 7 | 4325799 | A / G |
| 4 | ss.98955920 | 7 | 4325849 | C / T |
| 5 | ss.98955926 | 7 | 4326142 | A / G |
| 6 | ss.98955928 | 7 | 4326218 | T / C |
| 7 | ss.98955929 | 7 | 4326366 | T / C |
| 8 | ss.98955930 | 7 | 4326483 | C / T |
| 9 | ss.98955932 | 7 | 4327165 | C / G |
| 10 | ss.98955935 | 7 | 4327473 | G / A |
| 11 | ss.98955936 | 7 | 4327544 | C / T |
| 12 | ss.98955937 | 7 | 4327922 | A / T |
| 13 | ss.98955938 | 7 | 4328055 | G / A |
| 14 | ss.98955939 | 7 | 4328092 | | G/ GTT | |  | | --- | | | --- | --- | --- | |
| 15 | ss.98955940 | 7 | 4328236 | A / ATTAT |
| 16 | ss.98955941 | 7 | 4328376 | A / C |
| 17 | ss.98955942 | 7 | 4328395 | T / G |
| 18 | ss.98955944 | 7 | 4328510 | A / T |
| 19 | ss.98955945 | 7 | 4329261 | A / G |
| 20 | ss.98955946 | 7 | 4329478 | A / T |
| 21 | ss.98955947 | 7 | 4331106 | T / C |
| 22 | ss.98955948 | 7 | 4331147 | | C / T | |  | | --- | | | --- | --- | --- | |
| 23 | ss.98955949 | 7 | 4331347 | G / C |
| 24 | ss.98955950 | 7 | 4331466 | C / A |
| 25 | ss.98955951 | 7 | 4331855 | A / C |
| 26 | ss.98955952 | 7 | 4331890 | G / A |
| 27 | ss.98955953 | 7 | 4331974 | A / AT |
| 28 | ss.98955954 | 7 | 4332028 | T / G |
| 29 | ss.98955955 | 7 | 4332094 | C / T |
| 30 | ss.98955956 | 7 | 4332425 | C / T |
| 31 | ss.98955957 | 7 | 4332840 | T / A |
| 32 | ss.98955958 | 7 | 4333412 | G / A |
| 33 | ss.101071226 | 16 | 1725504 | ATTTTTC/A |
| 34 | ss.101071227 | 16 | 1726191 | G / GT |
| 35 | ss.101071230 | 16 | 1726943 | T / C |
| 36 | ss.101071231 | 16 | 1727005 | T / A |
| 37 | ss.101071233 | 16 | 1727144 | TAA / T, TA |
| 38 | ss.101071234 | 16 | 1727173 | G / C |
| 39 | ss.101071235 | 16 | 1727253 | T / A |
| 40 | ss.101071236 | 16 | 1727342 | T / C |
| 41 | ss.101071237 | 16 | 1727411 | TGGC / T |
| 42 | ss.101224843 | 16 | 29943837 | A / G |
| 43 | ss.101224844 | 16 | 29944247 | G / A |
| 44 | ss.101224845 | 16 | 29944393 | A / T |
| 45 | ss.101224846 | 16 | 29944713 | CTA / C |
| 46 | ss.101224848 | 16 | 29945025 | TAA / T |
| 47 | ss.101224850 | 16 | 29945161 | G / A |
| 48 | ss.101224852 | 16 | 29945261 | A / C |

Table S3 Primers for the known casual pod dehiscence mutation at the promoter of *SHAT1-5* (*pShat1-5*).

| Primer | 5’ -> 3’ | PCR conditions |
| --- | --- | --- |
| pShat1-5 Forward | CACTTTGTTTATAACTTTTGGTGCATGAC | 94°C 2min; then 35 cycles of 94°C for 20 sec, 58°C for 20 sec, 72°C for 40 sec; and finally 5 min at 72°C. |
| pShat1-5 Reverse | TTTTTGCTATAACAACATCGATTTTTC |

Table S4 Epistasis test among ss715624201, ss715598106 and ss715623567

|  | Df | Sum Sq | Mean Sq | F value | Pr(>F) |
| --- | --- | --- | --- | --- | --- |
| ss715624201 | 1 | 161.2 | 161.17 | 156.7 | < 2e-16 *** |
| ss715598106 | 1 | 15.0 | 14.99 | 14.6 | 0.0001*** |
| ss715623567 | 1 | 5.4 | 5.44 | 5.3 | 0.0217* |
| ss715624201:ss715598106 | 1 | 19.8 | 19.83 | 19.3 | 1.29e-05 *** |
| ss715624201:ss715623567 | 1 | 4.6 | 4.57 | 4.4 | 0.0354* |
| ss715598106:ss715623567 | 1 | 5.2 | 5.18 | 5.0 | 0.0251* |
| ss715624201:ss715598106:ss715623567 | 1 | 0.3 | 0.29 | 0.3 | 0.5973 |
| Residuals | 770 | 792.1 | 1.03 |  |  |

Significance level: ***, P < 0.001; **, P < 0.01; *, P < 0.05

Table S5 Alleles of the three loci associated with pod dehiscence among 17 ancestors that contributed 86% parentage of North America soybean cultivars.

| Ancestors | ss715624201 | ss715598106 | ss715623567 |
| --- | --- | --- | --- |
| FC 033243 | T | G | C |
| PI 548488 | T | G | C |
| PI 548298 | T | T | C |
| PI 548318 | C | G | C |
| PI 548391 | T | G | C |
| PI 548311 | T | G | C |
| PI 548406 | T | G | C |
| PI 548485 | T | G | T |
| PI 548603 | T | G | C |
| PI 548456 | C | G | C |
| PI 548657 | T | G | C |
| PI 548382 | C | G | C |
| PI 548348 | T | T | C |
| PI 548362 | T | G | C |
| PI 548379 | T | G | T |
| PI 548477 | T | G | C |
| PI 548445 | C | G | C |
| Dehiscent allele% | 24% | 12% | 88% |

Table S6 Information of the six of 758 *Glycine soja* accessions carrying the indehiscent allele ‘*T*’ at *ss715624201.*

| Accession | *ss715624201* | Maturity Group | Origin (China) |
| --- | --- | --- | --- |
| PI 464938 | *T* | V | Jiangsu |
| PI 468397A* | *T* | IV | Shanxi |
| PI 468397B* | *T* | IV | Shanxi |
| PI 483071A | *T* | IV | Shandong |
| PI 483462B | *T* | IV | Beijing |
| PI 549048 | *T* | III | Beijing |

*Completely identical at the known SNPs of the SoySNP50K data set between the two accessions.

A

B

C

Figure S1. Association analyses with and without population structure correction. A, QQ plot of the association analyses with K model (PCA = 0), PK model (PCA = 5), and QK model (K = 7). B and C, Manhattan plots of association mapping with PK model (PCA = 5) and QK model (K=7).


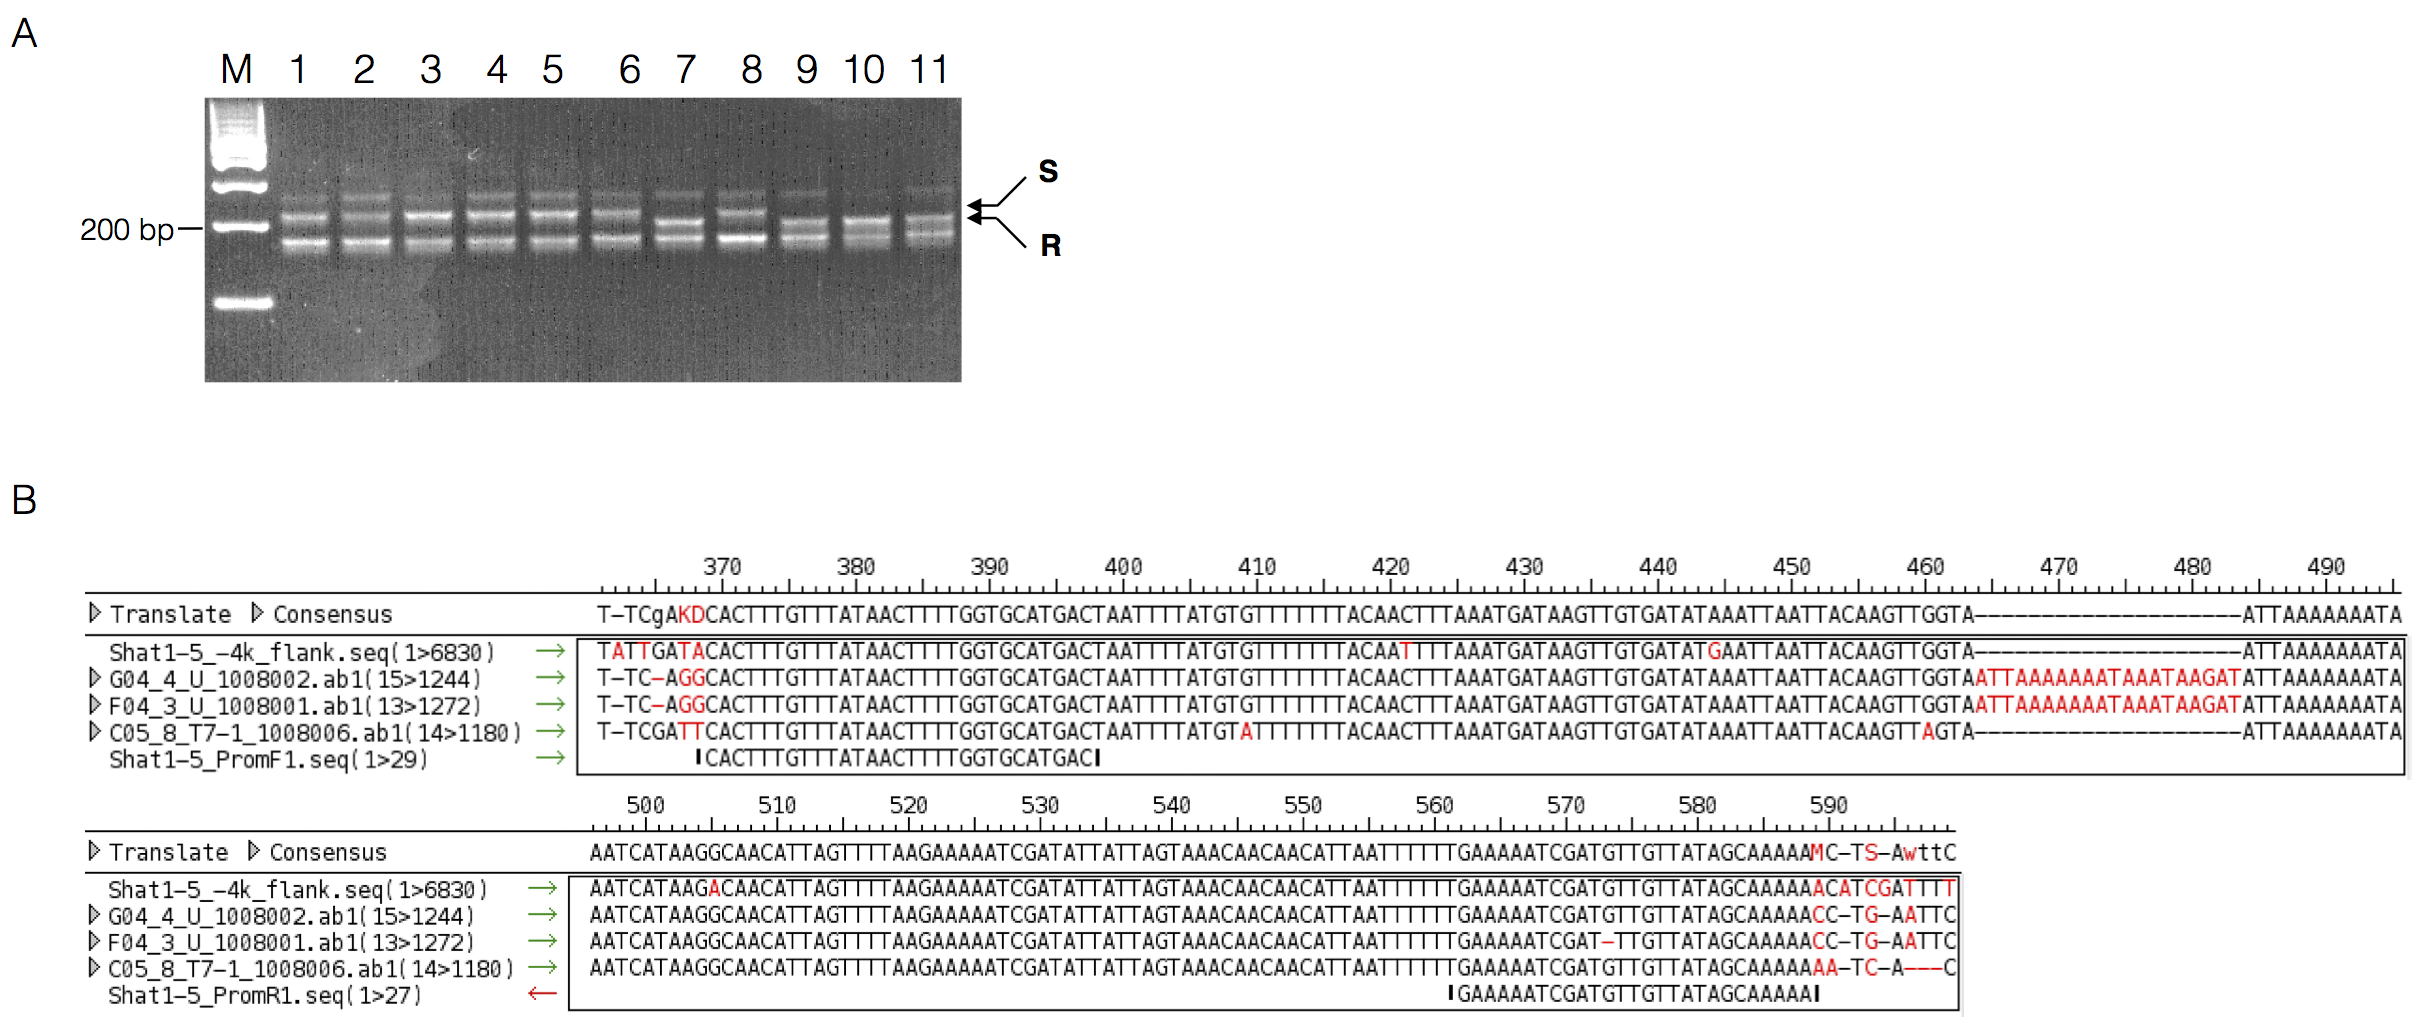


Figure S2. Genotyping and sequencing validation of the known causal polymorphism at the *pShat1-5* region. (A) Shown are the polymorphisms of PCR products of *pShat1-5* region among 11 soybean germplasm accessions. (B) Alignment of the PCR products sequencing results of three accessions and primers against the reference sequence of the soybean cultivar William 82 at the *pShat1-5* region.
